25 **Author summary**

26 Sleep in *Drosophila* occurs during both the day and night, yet the genetic pathways  
27 that selectively impact day versus night sleep are poorly understood. Here we uncover  
28 a link between the neuronal calcium sensor Neurocalcin and sleep in *Drosophila*. We  
29 show that Neurocalcin acts in a pathway involving the Dop1R1 dopamine receptor to  
30 promote sleep during the night, but not the day, and that the night-specific effect of  
31 NCA is coordinated by the circadian clock and light-sensing pathways. Furthermore,  
32 we identify a complex wake-promoting neuronal network in which NCA functions to  
33 regulate sleep, and our results suggest that NCA suppresses output from this circuit.  
34 Thus, we identify a novel role for Neurocalcin in *Drosophila* and shed light on the  
35 genetic regulation of distinct sleep stages.

36

## 37 **Introduction**

38 Sleep is a widely conserved and critical behavior that impacts numerous aspects of  
39 nervous system function, including neuronal development [1], clearance of metabolic  
40 waste [2], synaptic plasticity [3-6], and the generation of complex behaviors such as  
41 courtship and aggression [1, 7]. The fruit fly, *Drosophila melanogaster*, exhibits a  
42 sleep-like state characterized by periods of immobility, altered posture and elevated  
43 arousal thresholds [8, 9]. Similarly to mammals, sleep in *Drosophila* is regulated by  
44 circadian and homeostatic processes [10, 11]. Furthermore, just as human sleep can be  
45 separated into distinct temporal stages of differing arousal thresholds (REM and non-  
46 REM sleep), sleep in *Drosophila* also varies in intensity throughout the day/night  
47 cycle, with night sleep associated with higher arousal thresholds relative to day sleep  
48 [12].

49         Due to the vast genetic toolkit of *Drosophila*, many research groups have  
50 utilized this organism to identify sleep-relevant genes [11, 13-18], several of which  
51 have been shown to play a conserved role in regulating mammalian sleep [19, 20]. Of  
52 note, mutations in a select number of genes modulate either day or night sleep in  
53 *Drosophila*, suggesting an underlying genetic basis for the distinct characteristics of  
54 these separate sleep stages [21, 22]. Nonetheless, it is still unclear how day versus  
55 night sleep is designated to allow a given gene to specifically regulate one sleep phase  
56 or the other, and whether day and night sleep are defined by the circadian clock, the  
57 presence or absence of light, or both.

58         The identification of new genes selectively impacting day versus night sleep in  
59 *Drosophila* will help provide answers to such questions. Previously, unbiased large-  
60 scale screens of EMS-mutagenized [14, 17], P-element insertion [15], or transgenic  
61 RNAi knockdown lines [18] have been used to identify *Drosophila* sleep mutants. As

62 well as advancing our understanding of the genetic basis of sleep, such studies have  
63 yielded an additional benefit. Since distinct genes that similarly impact a given  
64 phenotype may act in a shared genetic network, identification of mutations that  
65 modulate sleep generates testable hypotheses regarding gene function. For example,  
66 the finding that Sleepless, a Ly6/neurotoxin-like protein, promotes expression of the  
67 Shaker potassium channel arose from the fact that both *sleepless* and *shaker* mutants  
68 exhibit sleep loss and ether-induced leg shaking [14, 15, 23], suggesting that these  
69 two proteins act in a common molecular pathway.

70         However, such genome-wide approaches are highly laborious, requiring  
71 screening of thousands of fly lines to identify a limited number of sleep mutants [15,  
72 17]. Thus, targeted screening strategies of higher efficiency may represent a useful  
73 complement to unbiased high-throughput, yet low yield, methodologies. Here we  
74 uncover a novel sleep-relevant gene in *Drosophila* using an approach based on  
75 genetic and neurobiological correlates between *Drosophila* sleep and a human  
76 movement disorder, primary dystonia. From an initial screen of just five candidate  
77 loci, we identify the neuronal calcium sensor Neurocalcin (NCA) as a sleep regulatory  
78 factor that specifically promotes night sleep in *Drosophila*. Our results reveal a novel  
79 role for NCA and demonstrate the utility of targeted mini-screens to study sleep in  
80 *Drosophila*.

81

82

## 83 **Results**

### 84 **Identification of Neurocalcin as a sleep-promoting factor**

85 We identified NCA as a novel sleep regulator using a guilt-by-association strategy  
86 based on phenotypes linked to mutations in *KCTDI7/insomniac*, homologous genes  
87 encoding a Cullin-3 adaptor protein in humans and *Drosophila* respectively [17, 24].  
88 In humans, a *KCTDI7* mutation causes myoclonus dystonia, a disorder characterised  
89 by repetitive movements, contorted postures and non-epileptic myoclonic jerks in the  
90 upper body [24]. In *Drosophila*, null or hypomorphic mutations in the *KCTDI7*  
91 homologue *insomniac (inc)* result in profound reductions in sleep [16, 17]. A potential  
92 link between these two phenotypes is dopamine signalling. Altered plasticity of  
93 dopaminergic circuits within the striatum, a motor control centre, has been proposed  
94 as a potential mechanism underlying dystonic movements [25]. In *Drosophila*,  
95 dopamine is a pro-arousal factor. Elevated dopaminergic neurotransmission strongly  
96 reduces sleep [26-28], and INC has been suggested to control sleep by negatively  
97 regulating dopamine signalling [16].

98         Since genes often act in conserved modules [29], we posited the existence of a  
99 partially conserved genetic network that, in humans, is linked to dystonia, and which  
100 in *Drosophila* may influence sleep, both through dopamine signalling. To test this, we  
101 used transgenic RNAi driven by the pan-neuronal driver *elav-Gal4* to knockdown  
102 expression of *Drosophila* homologs of the dystonia-genes *TORIA*, *GNAL*, *ANO3*,  
103 *THAP1* and *HPCA* [24, 30-34] (*dTorsin*, *GαS*, cg6938, cg10403 and *nca* respectively)  
104 in neurons, and subsequently measured sleep in knockdown flies and respective  
105 controls. Here, sleep is defined as 5 min of inactivity as measured by the *Drosophila*  
106 Activity Monitoring (DAM) system, a common standard in the field [35]. From this  
107 targeted small-scale screen, we found that expression of a transgenic RNAi line

108 (*kk108825*, termed *kk*, Fig 1A) targeting *nca* mRNA reduced night sleep, but not day  
109 sleep, in adult male flies housed under 12 h light: 12 h dark conditions (12L: 12D) at  
110 25°C (Fig 1A-C). Night-specific sleep loss due to neuronal *nca* knockdown was also  
111 observed in virgin adult female flies (S1A, B Fig), and in male flies expressing the *kk*  
112 *nca* RNAi using other pan-neuronal (*nsyb-Gal4*) or broadly expressed (*insomniac-*  
113 *Gal4*) drivers (S1C Fig).

114 Sleep architecture in *Drosophila* is generally studied in 12L: 12D conditions.  
115 Interestingly, we found that reduced night sleep in *nca* knockdown males appeared  
116 enhanced under short photoperiod conditions (8L: 16D) (Fig 1D). Similarly to 12L:  
117 12D conditions, in 8L: 16D day sleep was unaffected whilst night sleep was robustly  
118 reduced (Fig 1E, F). Night sleep loss under short photoperiod was also observed in  
119 flies expressing two other independent RNAi lines targeting *nca* mRNA (*hmj21533*  
120 and *jf03398*, termed *hmj* and *jf* respectively) (S2A-D Fig). The *kk* and *jf* dsRNAs  
121 target a partially overlapping sequence of *nca*, whereas *hmj* targets a distinct upstream  
122 sequence (S2A Fig). For each RNAi line, we confirmed reduced *nca* expression using  
123 qPCR (S2E Fig). Transcription of *nca* occurs from promoter regions shared with the  
124 downstream locus *cg7646* (S2A Fig), yet *cg7646* transcription was not affected by  
125 *nca* RNAi (S2F Fig), nor were any common off-target mRNAs predicted for the *kk*,  
126 *hmj* or *jf* dsRNA hairpins (data not shown). Since pan-neuronal expression of three  
127 independent RNAi lines targeting two separate regions of *nca* mRNA reduce night  
128 sleep, we conclude that NCA acts in the *Drosophila* nervous system to promote night  
129 sleep. For simplicity, we use the *kk nca* RNAi for all subsequent experiments, and  
130 refer to flies expressing *kk nca* RNAi under *elav-Gal4* as *nca*<sup>KD</sup> (*nca* knockdown). All  
131 experiments below are performed under 8L: 16D conditions unless otherwise stated.

132

133 **Neurocalcin promotes long sleep bouts in the early night**

134 To analyse the impact of NCA on night sleep in more detail, we utilised a custom-  
135 made sleep analysis package (see Methods) to measure the initiation and length of  
136 individual sleep bouts in *nca*<sup>KD</sup> and controls. We visualised individual sleep bouts  
137 across each population, plotting the time of onset and offset for night sleep bouts from  
138 n = 48 flies per genotype. Using this method, control flies containing either *nca* *kk*  
139 RNAi transgene or *elav*-Gal4 driver alone were observed to frequently initiate long  
140 sleep bouts in the early night (Fig 1G, H). In contrast, *nca*<sup>KD</sup> flies did not exhibit  
141 equivalent longer sleep bouts (Fig 1I). Thus, NCA acts in neurons to promote  
142 consolidated sleep, particularly during the early phase of the night.

143

144 **NCA does not impact circadian rhythmicity or waking activity**

145 NCA could potentially impact sleep indirectly via an effect on the circadian clock  
146 and/or locomotor activity. Firstly, we therefore tested whether NCA was under clock  
147 control or regulated circadian rhythms. *nca* mRNA expression did not cycle  
148 throughout the day/night cycle in whole head tissue (S3A Fig). Importantly, *nca*<sup>KD</sup>  
149 flies did not exhibit any change in circadian patterns of locomotor activity under  
150 constant dark conditions (S3B-C Fig). Furthermore, waking locomotor activity  
151 (defined as the number of DAM beam breaks per waking minute) was not  
152 significantly altered in *nca*<sup>KD</sup> flies (Fig 1K). These results suggest that *nca*  
153 knockdown does not indirectly impact sleep/wake behavior by altering locomotor  
154 activity or impacting the circadian clock.

155

156 **Light-sensing and circadian pathways modulate the effect of NCA on sleep**

157 The night-specificity of sleep loss in *nca*<sup>KD</sup> flies prompted us to test whether circadian  
158 and/or light-sensing pathways restrict the effect of *nca* knockdown on sleep to the  
159 night phase. Initially, we examined sleep patterns in *nca*<sup>KD</sup> flies under constant dark  
160 conditions, during which the circadian clock acts to distinguish subjective day from  
161 night. Interestingly, robust sleep loss in *nca*<sup>KD</sup> flies was restricted to the subjective  
162 night (Fig 2A, B).

163 As a complementary approach, we next analysed sleep in *nca*<sup>KD</sup> flies under  
164 two conditions in which the circadian clock is no longer functional. Firstly, in  
165 constant dark (DD) conditions and in an arrhythmic background due homozygosity  
166 for a *timeless* knockout allele [36]. In DD, and without a functional clock to  
167 demarcate subjective day from night, sleep loss was now observed throughout the 24  
168 h dark period (Fig 2C, D). Secondly, we examined the effect of *nca* knockdown under  
169 constant light conditions, in which the circadian clock becomes rapidly arrhythmic  
170 due to light-dependent degradation of Timeless [37-39]. Strikingly, in constant light,  
171 sleep loss in *nca*<sup>KD</sup> flies was completely suppressed (Fig 2E, F). From the above data,  
172 we conclude that the circadian clock is not required for NCA to promote sleep per se,  
173 but instead defines when NCA is sleep promoting, with light acting as an  
174 environmental signal that suppresses the impact of NCA on sleep.

175 We sought to determine which light-sensing pathways restrict the sleep-  
176 promoting role of NCA to the night. We reasoned that removing relevant  
177 photoreceptive molecules, cells or transduction pathways might restore sleep loss in  
178 *nca*<sup>KD</sup> flies during constant light conditions. Ablation of photoreceptor cells through  
179 expression of the pro-apoptotic gene *hid* (*gmr* > *hid*) did not restore sleep loss to  
180 *nca*<sup>KD</sup> flies during constant light conditions (Fig 2G, H). In contrast, using a loss of  
181 function allele of *cry* (*cry*<sup>02</sup>), we found that loss of CRY in constant light resulted in a



182 small but significant loss of sleep in *nca*<sup>KD</sup> flies (Fig 2I, J). CRY acts as a blue-light  
183 photoreceptor and has dual roles in synchronization of the circadian clock by light and  
184 light-dependent regulation of clock cell excitability [39, 40], suggesting that one or  
185 both of these pathways acts to modulate the timing of sleep loss in *nca*<sup>KD</sup> flies.  
186 However, the reduction in sleep in *nca*<sup>KD</sup>, *cry*<sup>02</sup> flies in constant light is lower in  
187 magnitude compared to *nca*<sup>KD</sup> flies in DD or 8L: 16D conditions (Fig 1B and 2A),  
188 suggesting that additional light-sensing pathways act in concert with CRY to inhibit  
189 the effect of reduced NCA levels on sleep/arousal. The restoration of clock function in  
190 *cry*<sup>02</sup> homozygotes in constant light conditions may also contribute to the observed  
191 sleep loss in *nca*<sup>KD</sup>, *cry*<sup>02</sup> flies under constant light [39].

192

### 193 **NCA acts in a common pathway with the Dop1R1 dopamine receptor**

194 NCA is highly homologous to the human neuronal calcium sensor Hippocalcin (S4  
195 Fig), and mutations in Hippocalcin cause DYT2 primary isolated dystonia [33]. One  
196 neuronal signalling mechanism frequently linked to dystonia is dopaminergic  
197 neurotransmission, with altered dopaminergic signalling within the striatum proposed  
198 to underlie forms of primary dystonia [41]. We therefore tested whether NCA  
199 modulates sleep via a dopaminergic mechanism. Under 8L: 16D conditions *nca*  
200 knockdown in dopaminergic neurons did not result in night sleep loss (Fig 3A and S1  
201 Table). However, heterozygosity for a null or strongly hypomorphic allele of the  
202 *Dop1R1* dopamine receptor (*Dop1R1*<sup>M103085-G</sup>, a homozygous lethal MiMIC insertion)  
203 rescued night sleep loss in *nca*<sup>KD</sup> flies (Fig 3B, C). Importantly, in both *elav-Gal4/+*  
204 and *kk/+* control backgrounds, heterozygosity for *Dop1R1*<sup>M103085-G</sup> did not alter sleep  
205 levels (Fig 3B, C;  $p > 0.05$ , Kruskal-Wallis test with Dunn's post-hoc test). A similar  
206 epistatic interaction between *nca* and *Dop1R1* was observed using a second, weaker

207 *Dop1R1* allele (*Dop1R1*<sup>M1004437</sup>) (S5 Fig). From the above results, we propose that  
208 NCA acts in a common pathway with Dop1R1 to regulate night sleep, potentially  
209 downstream of dopaminergic neurons.

210

### 211 **NCA acts in two distinct circuits to promote night sleep**

212 We next sought to delineate the neural circuits in which NCA functions to promote  
213 night sleep. Using cell-specific *nca* knockdown, we performed an extensive screen of  
214 sleep relevant circuits defined by numerous *promoter*-Gal4 driver lines (Fig 3A and  
215 S1 Table). These include clock, neurotransmitter-specific, fan-shaped body,  
216 mushroom body (MB), and sensory neurons (Fig 3A) [11, 36, 42-46]. Furthermore,  
217 given the genetic interaction between *nca* and *Dop1R1*, we utilised genomic enhancer  
218 elements in the *Dop1R1* locus to drive *nca* knockdown in subsets of potential  
219 Dop1R1-expressing neurons (Fig 3A and S1 Table) [47, 48]. However, in contrast to  
220 broadly expressed drivers (*elav*-, *nsyb*- and *inc*-Gal4), *nca* knockdown in restricted  
221 neural subsets was insufficient to significantly reduce night sleep (Fig 3A and S1  
222 Table).

223         These results suggested a complex sleep-relevant circuit requirement for NCA.  
224 Thus, we sought to reduce NCA levels in multiple sub-circuits to test for a  
225 simultaneous role of NCA in distinct anatomical regions. Through this approach, we  
226 found that *nca* knockdown using two *enhancer*-Gal4 lines (*R21G01* – an enhancer in  
227 the *TrpA1* locus, and *R72C01* – an enhancer in the *Dop1R1* locus), was sufficient to  
228 strongly phenocopy the effect of pan-neuronal *nca* knockdown on night sleep (Fig  
229 4A-C; compare Fig 4B with Fig 1B). For simplicity we refer to these drivers as *G01*  
230 and *C01* respectively.

231 Each *enhancer*-Gal4 line drives transgenic fluorophore expression in 150-200  
232 neurons in the adult male *Drosophila* brain (Fig 4A), and label neuropil regions that  
233 only partially overlap between the two drivers. The *G01* enhancer drives expression in  
234 a subset of MB neurons, a cluster of cell bodies adjacent to the anterior ventrolateral  
235 protocerebrum (AVP), and two visual sub-circuits: optic lobe (OL) and anterior optic  
236 tubercle (AoT) neurons. *C01* drives expression in the MBs, neurons projecting to the  
237 MB  $\gamma$ -lobes, and the antennal mechanosensory and motor center (AMMC) (Fig 4A).  
238 *G01* and *C01* also label dispersed cell bodies of unknown identity. The potential  
239 overlap of *G01* and *C01* in the MBs raised the possibility that sleep loss in *G01/C01*  
240  $>$  *nca* RNAi flies was due to strong NCA knockdown in neurons common to both the  
241 *G01* and *C01* enhancers. If so, driving *nca* RNAi with two copies of either *G01* or  
242 *C01* should mimic sleep loss in *G01/C01*  $>$  *nca* RNAi flies. However, this was not the  
243 case (S6 Fig). Thus, NCA is simultaneously required in non-overlapping sub-circuits  
244 labelled by the *G01* and *C01* enhancers.

245 Given that *C01* is a *Dop1R1* enhancer element, that *nca* and *Dop1R1*  
246 genetically interact to regulate sleep (Fig 3B), and that Dop1R1 is highly expressed in  
247 the MBs [49], we tested whether the MBs were a constituent of the *C01* expression  
248 domain by swapping *C01* for the MB-specific driver *ok107* and measuring sleep in  
249 flies expressing *nca* RNAi in both *G01* and MB neurons. Indeed, knockdown of *nca*  
250 in both *G01*- and MB-neurons also specifically reduced night sleep (Fig 4D), albeit to  
251 a weaker degree compared to knockdown in *G01*- and *C01*-neurons (compare Fig 4C  
252 and 4D). Thus, we conclude that the MBs are an important component of a complex  
253 network defined by *C01*-Gal4 with additional, as yet undefined, neurons acting within  
254 both the *C01* and *G01* domains to regulate night sleep.

255

256 ***G01*-neurons enhance *C01*-mediated arousal**

257 To confirm a sleep-relevant role for *C01*- and *G01*-neurons we tested whether  
258 activation of either subpopulation was sufficient to alter sleep. To do so, we expressed  
259 the temperature-sensitive channel TrpA1 in either neuronal subset or both, and shifted  
260 flies from a non-activating temperature (22°C) to an activating temperature (27°C)  
261 sufficient to cause hyperactive neurotransmission through TrpA1-mediated cation  
262 influx [50] (Fig 5A). At the non-activating temperature, over-expression of TrpA1 in  
263 either circuit or both did not alter sleep levels (Fig 5B). At the activating temperature,  
264 excitation of *G01*-neurons did not alter night sleep levels relative to controls (Fig 5C).  
265 In contrast, excitation of *C01*-neurons profoundly reduced night sleep (Fig 5C, D) as  
266 well as day sleep (Fig 5C). Interestingly, simultaneous activation of *C01*- and *G01*-  
267 neurons further reduced night sleep relative to activation of *C01*-neurons alone,  
268 despite the lack of effect of *G01*-neuron activation on sleep (Fig 5C, D). These results  
269 suggest that the *C01*- and *G01*-circuits interact to regulate sleep, with *C01*-neurons  
270 acting as a predominant pro-arousal circuit and *G01*-neurons acting in a modulatory  
271 manner to enhance the impact of *C01*-activation on night sleep. We infer from the  
272 above data that NCA suppresses excitability and/or neurotransmitter release in *C01*-  
273 and *G01*-neurons in a clock- and light-dependent manner. These modulatory inputs  
274 are likely to be bypassed by ectopic TrpA1 activation, resulting in sleep loss during  
275 both day and night, in contrast to the night-specific effect of *nca* knockdown.

276 **Discussion**

277 *Drosophila* Neurocalcin (NCA) is a member of the neuronal calcium sensor family of  
278 cytosolic proteins [51]. Previous work has shown that NCA is a calcium-binding  
279 protein and that NCA is widely expressed throughout synaptic neuropil regions of the  
280 adult fly brain [52]. Despite this, the neurobiological roles of NCA have remained  
281 unclear. Using a hypothesis-driven approach based on genetic and neurobiological  
282 correlates between *Drosophila* sleep and a human movement disorder, we have  
283 uncovered a novel role for NCA as a night sleep-promoting factor.

284 Our results show that both internal and external cues are integrated by the  
285 *Drosophila* nervous system to regulate when NCA impacts sleep. Internal cues are  
286 generated by the circadian clock with light acting in parallel as an external signal (Fig  
287 2). Together, these demarcate the temporal window within which NCA promotes  
288 sleep. Interestingly, this mode of coordinate regulation by the clock and light contrasts  
289 with *Drosophila* NMDA receptor 1 (*Nmdar1*) knockdown flies [22]. Reduced  
290 *Nmdar1* similarly results in night-specific sleep loss under light-dark cycles, but sleep  
291 loss is extended to both subjective day and night during constant-dark conditions,  
292 indicating that the effect of *Nmdar1* on sleep is gated solely by light [22]. Why  
293 *Drosophila* utilizes distinct mechanisms to time the effect-windows of specific sleep-  
294 promoting factors is an intriguing question for future investigations.

295 Similarly to many sleep-promoting factors in *Drosophila* [13, 17, 18, 22, 53,  
296 54], sleep-relevant NCA activity does not map onto a single cell-type within the  
297 *Drosophila* nervous system. Rather, NCA acts in multiple neuropil regions, each  
298 contributing to a net promotion of night sleep (Figs 3 and 4). One such region is the  
299 MB, a well-defined memory and sleep-regulatory center [43, 44, 46, 55]. However,  
300 further work is required to identify the full spectrum of key cell-types within the *G01*-

301 and *C01*-Gal4 expression domains. Acute activation of *G01*- and/or *C01*-neurons  
302 demonstrates that *C01*-neurons are wake-promoting, while *G01*-neurons enhance  
303 wakefulness only in the context of *C01*-neuron activation (Fig 5). Based on our data,  
304 we therefore hypothesize that reduction of NCA in both neuronal subsets causes mild  
305 hyperexcitation, which in *C01*-neurons alone is insufficient to modulate sleep but in  
306 both populations simultaneously causes an increase in network excitability sufficient  
307 to reduce night sleep. In this model, dopamine signalling through Dop1R1 gives  
308 excitatory drive to wake-promoting *C01*-neurons (defined by a *Dop1R1* enhancer  
309 element), and thus reducing Dop1R1 expression negates the increased firing and/or  
310 synaptic release caused by *nca* knockdown (Fig 3). Alternatively, Dop1R1 may act  
311 downstream of wake-promoting *C01*-neurons. Interestingly, neither *C01*- or *G01*-  
312 population includes the fan-shaped body (FSB), a region previously shown to  
313 facilitate dopamine-sensitive arousal via Dop1R1 [27, 28].

314         How might NCA regulate neuronal activity? The mammalian NCA homolog  
315 Hippocalcin undertakes pleiotropic roles in mammalian neurons, including facilitating  
316 NMDA receptor endocytosis during LTD and gating the slow afterhyperpolarisation,  
317 a potassium current mediated by KCNQ channels [56-59]. Furthermore, recent data  
318 suggest that Hippocalcin negatively regulates calcium influx through N-type voltage-  
319 gated calcium channels [60]. Given the strong homology between Hippocalcin and  
320 NCA, it is possible that NCA plays similar roles in *Drosophila* neurons. However,  
321 further research is required to identify the key molecular pathways through which  
322 NCA impacts sleep.

323         Finally, our work adds to a growing body of evidence linking *Drosophila*  
324 homologues of primary dystonia genes to dopaminergic signalling. *Torsin* is the  
325 *Drosophila* homologue of the dystonia-gene *TOR1A* and has been shown to play a

326 role in dopamine metabolism by regulating expression of GTP cyclohydrolase, a  
327 component of the dopamine synthesis pathway that is also mutated in L-Dopa-  
328 responsive dystonia [30, 61-63]. *Drosophila insomniac* is homologous to the  
329 myoclonus dystonia-gene *KCTD17* (as well the paralogs *KCTD2* and *KCTD5*) [17,  
330 24, 64], and sleep loss in *insomniac* mutants can be rescued by inhibition of dopamine  
331 synthesis [16]. Correspondingly, our work suggests that NCA acts downstream of  
332 dopaminergic neurons in a pathway involving the Dop1R1 dopamine receptor. Given  
333 the link between Torsin, Insomniac and NCA with dopamine signalling, it will be  
334 intriguing to test whether dystonia-gene homologues modulate other dopamine-related  
335 behaviours in *Drosophila*, including sleep, learning, forgetting and courtship [26, 65-  
336 69].  
337

## 338 **Materials and Methods**

### 339 **Fly husbandry**

340 Fly strains and crossings are maintained on standard fly food at constant temperature  
341 25°C under 12 h:12 h light-dark cycles (12L: 12D). The following strains were  
342 obtained from Bloomington and/or VDRC stock centers: *kk108825* (v100625),  
343 *hmj21533* (54814), *jf03398* (29461), *Dop1RI*<sup>MI03085-GFSTF.2</sup> (59802),  
344 *Dop1RI*<sup>MI04437</sup> (43773), *ple-Gal4* (8848), *Chat-Gal4* (6798), *vGlut-Gal4* (26160),  
345 *GAD-Gal4* (51630), *Ddc-Gal4*(7010), *GMR-Gal4* (1104), *Trh.1-Gal4* (38388), *Tdc2-*  
346 *Gal4*(9313), *C5-Gal4* (30839) and *ok107-Gal4* (854). The remaining lines obtained  
347 from Bloomington stock center are Janelia Flylight collection with identifiable  
348 prefixes: R23E10-Gal4, R55B01-Gal4, R52H12-Gal4, *Hdc-Gal4* (R17F12-Gal4),  
349 R21G01-Gal4, R72B05-Gal4, R72B07-Gal4, R72B08-Gal4, R72B11-Gal4, R72C01-  
350 Gal4, and R72C02-Gal4. The following lines were gifts from laboratories of  
351 Kyunghee Koh: *elav-Gal4*, *nsyb-Gal4*, *tim-Gal4* and *TUG-Gal4*, Joerg Albert:  
352 *nompC-Gal4* [70] and Nicolas Stavropoulos: *inc-Gal4:2* [17]. *ppk-Gal4*, *TrpA1-CD-*  
353 *Gal4* was described previously [71]. *GMR-hid*, *tim*<sup>KO</sup> and *cry*<sup>02</sup> were previously  
354 described in [36]. Except for *Ddc-Gal4*, *Trh.1-Gal4*, *Tdc2-Gal4*, *nompC-Gal4* and  
355 *Hdc-Gal4*, all *Drosophila* strains used for sleep-wake assay were either outcrossed  
356 five times into a standard isogenic background (iso31) or insertion-free chromosomes  
357 were exchanged with the iso31 line (*hmj21533*, *jf03398*, *Dop1RI*<sup>MI03085-G</sup> and  
358 *Dop1RI*<sup>MI04437</sup>).

### 359 **RNA extraction and Quantitative PCR**

360 10-20 fly heads per genotype were collected with liquid nitrogen and dry ice at  
361 indicated time points (S3 Fig). Total RNA was extracted using TRIzol™ reagent  
362 following manufacturer's manual (Thermo Fisher Scientific). cDNA were reversed



363 transcribed from 250 or 500 ng of DNase I (M0303S, NEB) treated RNA sample via  
364 MMLV RT (M170A, Promega). A set of five or six standards across 3125 fold  
365 dilution were prepared from the equally pooled cDNA of all genotypes in each  
366 experiment. Triplicated PCR reactions were prepared in 96-well or 384-well plates for  
367 standards and the cDNA sample of each genotype (20 to 40 fold dilution) by mixing  
368 in Power SYBR Green Master Mix (Thermo Fisher Scientific) and the following  
369 primer sets: ncaqF2: acagagttcacagacgctgag, ncaqR2: ttgctagcgtcaccatattggg;  
370 cg7646F: gccttcgaatgtacgatgtcg, cg7646R: cctagcatgtcataaattgcctgaac or  
371 rp49F:cgatatgctaagctgtcgaca, rp49R: cgcttgctgatccgtaacc. The PCR reactions were  
372 then performed in Applied Biosystems StepOne (96-wells module) or QuantStudio  
373 6Flex instruments (384 wells module) using the standard thermocycle. Melting curve  
374 analysis was also performed to evaluate the quality of the PCR product and avoiding  
375 contamination. The Ct values were exported as csv files and a standard curve between  
376 Ct values and logarithm of dilution were calculated using liner regression function in  
377 Graphpad. The relative expression level for *nca*, *cg7646* and *rp49* of each sample  
378 were estimated by interpolation and anti-logarithm. The expression levels for *nca* and  
379 *cg7646* of each genotype were further normalized to their respective average *rp49*  
380 level. The statistical difference between the normalized expression levels of each  
381 genotype were determined by Kruskal-Wallis test with Dunn's post-hoc test using  
382 Graphpad software.

### 383 **Sleep-wake behavioral analysis**

384 Three to five days old male or virgin female flies of given genotypes were collected  
385 and loaded into glass tubes containing 4% sucrose and 2% agar (w/v). The sleep-wake  
386 behaviors were recorded by Drosophila Activity Monitor (DAM) system for 3 days in  
387 the designated LD regime (L12:D12, L8:D16, DD or LL). The behavior recordings

388 from the third day of the given LD regime were then analyzed. All flies were  
389 entrained to 12L: 12D prior to entering designed LD regimes, except for one *cry*<sup>02</sup>  
390 experiment that flies were entrained to 8L: 16D condition (one of the three  
391 independent experiments shown in Fig 2I and J). *Drosophila* activity (or wake) is  
392 measured by infra-red beam crosses and sleep is defined by 5 minutes with no activity  
393 (no beam crosses). Customized Excel calculators (supplementary file 1) and R scripts  
394 ([https://github.com/PatrickKratsch/DAM\\_analysR](https://github.com/PatrickKratsch/DAM_analysR)) were developed to calculate the  
395 following parameters for individual flies: *Onset and offset of each sleep bout, sleep*  
396 *bout length, day and night sleep minutes, daily total sleep minutes, and daily sleep*  
397 *profile* (30 minutes interval). An established MATLAB® based tool, Flytoolbox, was  
398 used for circadian rhythmicity analysis [72, 73]. Briefly, the strength of rhythmicity  
399 (RI) was estimated using the height of the third peak coefficient in the auto-  
400 correlogram calculated for the activity time series of each fly. Rhythmic Statistics  
401 values were then obtained from the ratio of the RI value to the 95% confidence  
402 interval for the correlogram ( $2/\sqrt{N}$ , where N is the number of observations, which  
403 correlatively increase with the sampling frequency), in order to determine statistical  
404 significance of any identified period (RS is  $\geq 1$ )

#### 405 **Immunohistochemistry and confocal microscopy**

406 Adult male fly of R72C01 > CD8::*GFP* and R21G01 > CD4::*tdTomato* were  
407 anesthetized in 70% ethanol before brains were dissected in PBT (0.1M phosphate  
408 buffer with 0.3% TritonX100) and collected in 4% paraformaldehyde/PBT on ice.  
409 The fixation was then performed at room temperature for 15 mins before washing 3  
410 times with PBT. The brain samples were blocked by 5% goat serum/PBT for 1 h at  
411 room temperature before incubation with mouse anti-nc82 (1:200) plus rabbit anti-  
412 GFP (1:1000) or rabbit anti-dsRED (1:2000) in 5% goat serum/PBT at 4°C over 48 h.

413 The samples were washed 6 times with PBT before incubated with Alexa Fluor 647  
414 goat anti-mouse IgG (1:500) plus Alexa Fluor 488 goat anti-rabbit IgG (1:2000) or  
415 Alexa Fluor 555 goat anti-rabbit IgG (1:2000) in 5% goat serum/PBT at 4°C over 24  
416 h. After washing 6 times with PBT, the samples were mounted in SlowFade Gold  
417 antifade reagent (S36936, Thermo Fisher Scientific) on microscope slides and stored  
418 at 4°C until imaged by inverted confocal microscope Zeiss LSM 710.

#### 419 **Bioinformatics**

420 Conservation of amino acid residues between *Drosophila* Neurocalcin and human  
421 Hippocalcin was determined using ClustalW2 software for multiple sequence  
422 alignment. Amino-acid identity and similarity was visualised using BOXSHADE.  
423

424 **Acknowledgements**

425 We thank Jack Humphrey for performing initial work on *neurocalcin* knockdown  
426 flies, and Kyunghye Koh for helpful comments on the manuscript. This study was  
427 supported by the Wellcome Trust (Synaptopathies strategic award (104033)), and by  
428 the MRC (New Investigator Grant MR/P012256/1). P.K is supported by a Wellcome  
429 Trust Neuroscience PhD studentship.

430

431 **Author Contributions**

432 Conceptualization, K-F.C and J.E.C.J; Data curation, P.K; Formal Analysis, K-F.C,  
433 A.L and P.K; Methodology, K-F.C and P.K; Investigation, K-F.C, A.L and J.E.C.J;  
434 Resources, J.E.C.J; Software, P.K; Writing – Original Draft, K-F.C and J.E.C.J;  
435 Writing – Review & Editing, K-F.C, A.L. P.K and J.E.C.J; Visualisation, K-F.C and  
436 J.E.C.J; Supervision, J.E.C.J; Project Administration, J.E.C.J; Funding Acquisition,  
437 J.E.C.J.

438

439

440 **Figure Legends**

441

442 **Fig. 1 Neurocalcin knockdown results in a loss of consolidated sleep during the**  
443 **early night in *Drosophila*. (A)** Mean sleep levels in 12L: 12D conditions for  $nca^{KD}$   
444 adult males and associated controls (*elav*-Gal4 driver or RNAi transgene  
445 heterozygotes). **(B-C)** Median day **(B)** and night **(C)** sleep levels in the above  
446 genotypes. **(D)** Mean sleep levels in 8L: 16D conditions for  $nca^{KD}$  adult males and  
447 associated controls. **(E-F)** Median day and night sleep levels in the above genotypes  
448 during 8L: 16D conditions. Data are presented as Tukey box plots. The 25<sup>th</sup>, Median,  
449 75<sup>th</sup> percentiles are shown. Whiskers represent 1.5 x the interquartile range. Identical  
450 representations are used in all subsequent box plots. **A-C:** n = 48 for each genotype;  
451 **D-F:** 55 > n > 54. **(G-I)** Individual sleep bout durations were measured using a  
452 custom-made R program and visualised by plotting sleep bout onset against offset for  
453 sleep bouts in control and  $nca^{KD}$  adult males under 8L: 16D conditions. In control  
454 flies (*elav* > + and + > *kk*), longer sleep bouts initiated early during the night are  
455 highlighted in red **(G, H)**, which are largely absent in  $nca^{KD}$  adult males **(I)**. n = 48  
456 for each genotype. **(J)** Distribution of sleep bout lengths in  $nca^{KD}$  and control adult  
457 males. Note the significant shift towards shorter sleep bout lengths in  $nca^{KD}$  flies  
458 ( $nca^{KD}$  vs. driver:  $\chi^2$ , *df*: 142.0, 4, p < 0.0001;  $nca^{KD}$  vs. RNAi:  $\chi^2$ , *df*: 2112.0, 4, p <  
459 0.0001). **(K)** Number of DAM beam breaks per waking minute for  $nca^{KD}$  and control  
460 adult males during night phase of 8L: 16D cycles. 55 > n > 54. \*\*\*p < 0.0005, ns - p  
461 > 0.05 as compared to driver and RNAi alone controls via Kruskal-Wallis test with  
462 Dunn's post-hoc test.

463

464 **Fig. 2 The circadian clock and light-sensing pathways regulate sleep promotion**  
465 **by NCA. (A-B)** Mean sleep levels in *nca*<sup>KD</sup> and control adult males across 24 h in  
466 constant-dark (DD) conditions **(A)**, and total median sleep levels in the above  
467 genotypes **(B)**. 47 > n > 44. Note the reduced sleep in the subjective night in *nca*<sup>KD</sup>  
468 relative to control adult males, but not the day. **(C-D)** Mean sleep levels in *nca*<sup>KD</sup> and  
469 control adult males across 24 h in constant-dark (DD) conditions in a *timeless*  
470 knockout (*tim*<sup>KO</sup>) background **(C)**, and total median sleep levels **(D)**. 39 > n > 32. **(E-**  
471 **F)** Mean sleep levels in *nca*<sup>KD</sup> and control adult males across 24 h in constant-light  
472 (LL) conditions **(E)**, and total median sleep levels in the above genotypes **(F)**. 47 > n  
473 > 44. **(G-H)** Mean sleep levels in *nca*<sup>KD</sup> and control adult males across 24 h in  
474 constant-light (LL) conditions in a *gmr > hid* background **(G)**, and total median sleep  
475 levels in the above genotypes **(H)**. *elav > kk*, *gmr-hid/+*: n = 51; + > *kk*, *gmr-hid/+*: n  
476 = 48; *elav > +*, *gmr-hid/+*: n = 24. **(I-J)** Mean sleep levels in *nca*<sup>KD</sup> and control adult  
477 males across 24 h in constant-light (LL) conditions in a *cryptochrome* null (*cry*<sup>02</sup>)  
478 background **(I)**, and total median sleep levels in the above genotypes **(J)**. 72 > n > 61.  
479 Note the small but consistent reduction in sleep in *nca*<sup>KD</sup>, *cry*<sup>02</sup> males **(I)**, leading to a  
480 significant decrease in total median sleep levels relative to controls **(J)**. \*\*\*p <  
481 0.0005, ns - p > 0.05, as compared to driver and RNAi alone controls via Kruskal-  
482 Wallis test with Dunn's post-hoc test.

483

484 **Fig. 3 NCA and Dop1R1 genetically interact to regulate sleep. (A)** Transgenic  
485 RNAi-based mini-screen to identify key NCA-expressing neurons. NCA knockdown  
486 with broadly expressed drivers results in reduced night sleep in adult males under 8L:  
487 16D conditions. In contrast, NCA knockdown in previously defined sleep-regulatory  
488 centers, clock neurons, the visual system or subsets of Dop1R1-expressing neurons

489 did not impact night sleep. FSB: fan-shaped body. MB: mushroom body. Grey and  
490 blue box plots: control lines. Red box plots: experimental lines showing reduced night  
491 sleep relative to both controls. Green box plots: experimental lines failing to show  
492 reduced night sleep relative to one or both controls. See S1 Table for n-values and  
493 statistical comparisons. **(B-C)** heterozygosity for the null or strongly hypomorphic  
494 *Dop1R1* allele *Dop1R1*<sup>MI03085-G</sup> (*DIR1/+*) suppressed sleep loss in *nca*<sup>KD</sup> adult males,  
495 but did not alter sleep in control males. Mean sleep patterns in 8L: 16D conditions are  
496 shown in **(B)**. Median night sleep levels are shown in **(C)**. \*\*p < 0.005, \*\*\*p <  
497 0.0005, as compared to driver and RNAi alone controls via Kruskal-Wallis test with  
498 Dunn's post-hoc test. *elav>kk, DIR1/+*: n = 32; *elav > +, DIR1/+*: n = 15; *+ > kk,*  
499 *DIR1/+*: n = 32; *elav > kk*: n = 48; *elav > +*: n = 47; *+ > kk*: n = 48.

500

501 **Fig. 4 NCA acts in a distributed neural network to regulate night sleep. (A)**

502 Confocal z-stacks of adult male brains expressing genetically-encoded fluorophores  
503 under the *G01* or *C01*-Gal4 drivers. Neuropil regions are labelled with anti-Bruchpilot  
504 (BRP, nc82). Scale bar = 100  $\mu$ m. Arrows point to neuropil centers. AoT: anterior  
505 optic tubercle. MBs: mushroom body neurons. OL: optic lobe. AMMC: antennal  
506 mechanosensory and motor center. **(B-C)** *nca* knockdown in both *G01* and *C01*-  
507 neurons recapitulates the effect of pan-neuronal *nca* knockdown, whereas *nca*  
508 knockdown in either neuronal subpopulation alone does not reduce sleep relative to  
509 controls. Mean sleep patterns in 8L: 16D conditions are shown in **(B)**. Median night  
510 sleep levels are shown in **(C)**. *+ > kk*: n = 80; *C01 > +*: n = 64, *C01 > kk*: n = 80; *G01*  
511 *> +*: n = 31; *G01 > kk*: n = 31; *C01/G01 > +*: n = 42; *C01/G01 > kk*: n = 71. **(D-E)**  
512 *nca* knockdown in both *G01* and MB-neurons (defined by *ok107*-Gal4; *ok107*) also  
513 results in reduced night sleep (also see Fig. 3A showing *ok107 > kk* does not cause

514 sleep loss). Mean sleep patterns in 8L: 16D conditions are shown in **(D)**. Median night  
515 sleep levels are shown in **(E)**. + > *kk*: n = 31; *G01/ok107* > +: n = 33; *G01/ok107* > *kk*:  
516 n = 42. \*p < 0.05, \*\*p < 0.005, \*\*\*p < 0.0005, ns – p > 0.05, as compared to driver  
517 and RNAi alone controls via Kruskal-Wallis test with Dunn's post-hoc test.

518

519 **Fig. 5 *C01*-neurons are wake-promoting and are modulated by *G01*-neurons. (A)**

520 Experimental paradigm for acute activation of *G01* or *C01*-neurons. 22°C: non-  
521 activating temperature for *TrpA1*. 27°C: activating temperature. Sleep measurements  
522 were measured over two days in 8L: 16D conditions. **(B-C)** Mean sleep levels across  
523 8L: 16D following expression of *TrpA1* in *G01*-, *C01*- or *G01*- and *C01*-neurons (and  
524 associated controls) at 22°C **(B)** or 27°C **(C)**. **(D)** Median change in night sleep levels  
525 ( $\Delta$  night sleep) following the shift from 22°C on day 1 to 27°C on day 2. + > *TrpA1*: n  
526 = 53; *G01* > +: n = 23; *G01* > *TrpA1*: n = 68; *C01* > +: n = 24; *C01* > *TrpA1*: n = 40;  
527 *C01/G01* > +: n = 33; *C01/G01* > *TrpA1*: n = 40. \*\*\*p < 0.0005, ns – p > 0.05, as  
528 compared to *TrpA1* or driver alone controls by Kruskal-Wallis test with Dunn's post-  
529 hoc test (for *C01*, *G01* or *C01/G01* > *TrpA1* compared to controls) or Mann-Whitney  
530 test (for *C01/G01* > *TrpA1* compared to *C01* > *TrpA1*).

531



## 532 **References**

- 533 1. Kayser MS, Yue Z, Sehgal A. A critical period of sleep for development of  
534 courtship circuitry and behavior in *Drosophila*. *Science*. 2014;344(6181):269-74. doi:  
535 10.1126/science.1250553.
- 536 2. Xie L, Kang H, Xu Q, Chen MJ, Liao Y, Thiyagarajan M, et al. Sleep drives  
537 metabolite clearance from the adult brain. *Science*. 2013;342(6156):373-7. doi:  
538 10.1126/science.1241224.
- 539 3. Havekes R, Park AJ, Tudor JC, Luczak VG, Hansen RT, Ferri SL, et al. Sleep  
540 deprivation causes memory deficits by negatively impacting neuronal connectivity in  
541 hippocampal area CA1. *Elife*. 2016;5. doi: 10.7554/eLife.13424.
- 542 4. Kuhn M, Wolf E, Maier JG, Mainberger F, Feige B, Schmid H, et al. Sleep  
543 recalibrates homeostatic and associative synaptic plasticity in the human cortex. *Nat*  
544 *Commun*. 2016;7:12455. doi: 10.1038/ncomms12455.
- 545 5. Li W, Ma L, Yang G, Gan WB. REM sleep selectively prunes and maintains  
546 new synapses in development and learning. *Nat Neurosci*. 2017;20(3):427-37. doi:  
547 10.1038/nn.4479.
- 548 6. Yang G, Lai CS, Cichon J, Ma L, Li W, Gan WB. Sleep promotes branch-  
549 specific formation of dendritic spines after learning. *Science*. 2014;344(6188):1173-8.  
550 doi: 10.1126/science.1249098.
- 551 7. Kayser MS, Mainwaring B, Yue Z, Sehgal A. Sleep deprivation suppresses  
552 aggression in *Drosophila*. *Elife*. 2015;4:e07643. doi: 10.7554/eLife.07643.
- 553 8. Hendricks JC, Finn SM, Panckeri KA, Chavkin J, Williams JA, Sehgal A, et  
554 al. Rest in *Drosophila* is a sleep-like state. *Neuron*. 2000;25(1):129-38.
- 555 9. Shaw PJ, Cirelli C, Greenspan RJ, Tononi G. Correlates of sleep and waking  
556 in *Drosophila melanogaster*. *Science*. 2000;287(5459):1834-7.

- 557 10. Huber R, Hill SL, Holladay C, Biesiadecki M, Tononi G, Cirelli C. Sleep  
558 homeostasis in *Drosophila melanogaster*. *Sleep*. 2004;27(4):628-39.
- 559 11. Liu S, Lamaze A, Liu Q, Tabuchi M, Yang Y, Fowler M, et al. WIDE  
560 AWAKE mediates the circadian timing of sleep onset. *Neuron*. 2014;82(1):151-66.  
561 doi: 10.1016/j.neuron.2014.01.040.
- 562 12. van Alphen B, Yap MH, Kirszenblat L, Kottler B, van Swinderen B. A  
563 dynamic deep sleep stage in *Drosophila*. *J Neurosci*. 2013;33(16):6917-27. doi:  
564 10.1523/JNEUROSCI.0061-13.2013.
- 565 13. Afonso DJ, Liu D, Machado DR, Pan H, Jepson JE, Rogulja D, et al.  
566 TARANIS Functions with Cyclin A and Cdk1 in a Novel Arousal Center to Control  
567 Sleep in *Drosophila*. *Curr Biol*. 2015;25(13):1717-26. doi:  
568 10.1016/j.cub.2015.05.037.
- 569 14. Cirelli C, Bushey D, Hill S, Huber R, Kreber R, Ganetzky B, et al. Reduced  
570 sleep in *Drosophila Shaker* mutants. *Nature*. 2005;434(7037):1087-92. doi:  
571 10.1038/nature03486.
- 572 15. Koh K, Joiner WJ, Wu MN, Yue Z, Smith CJ, Sehgal A. Identification of  
573 SLEEPLESS, a sleep-promoting factor. *Science*. 2008;321(5887):372-6. doi:  
574 10.1126/science.1155942.
- 575 16. Pfeiffenberger C, Allada R. *Cul3* and the BTB adaptor *insomniac* are key  
576 regulators of sleep homeostasis and a dopamine arousal pathway in *Drosophila*. *PLoS*  
577 *Genet*. 2012;8(10):e1003003. doi: 10.1371/journal.pgen.1003003.
- 578 17. Stavropoulos N, Young MW. *insomniac* and *Cullin-3* regulate sleep and  
579 wakefulness in *Drosophila*. *Neuron*. 2011;72(6):964-76. doi:  
580 10.1016/j.neuron.2011.12.003.

- 581 18. Rogulja D, Young MW. Control of sleep by cyclin A and its regulator.  
582 Science. 2012;335(6076):1617-21. doi: 10.1126/science.1212476.
- 583 19. Douglas CL, Vyazovskiy V, Southard T, Chiu SY, Messing A, Tononi G, et  
584 al. Sleep in *Kcna2* knockout mice. BMC Biol. 2007;5:42. doi: 10.1186/1741-7007-5-  
585 42.
- 586 20. Graves LA, Hellman K, Veasey S, Blendy JA, Pack AI, Abel T. Genetic  
587 evidence for a role of CREB in sustained cortical arousal. J Neurophysiol.  
588 2003;90(2):1152-9. doi: 10.1152/jn.00882.2002.
- 589 21. Ishimoto H, Lark A, Kitamoto T. Factors that Differentially Affect Daytime  
590 and Nighttime Sleep in *Drosophila melanogaster*. Front Neurol. 2012;3:24. doi:  
591 10.3389/fneur.2012.00024.
- 592 22. Tomita J, Ueno T, Mitsuyoshi M, Kume S, Kume K. The NMDA Receptor  
593 Promotes Sleep in the Fruit Fly, *Drosophila melanogaster*. PLoS One.  
594 2015;10(5):e0128101. doi: 10.1371/journal.pone.0128101.
- 595 23. Wu MN, Joiner WJ, Dean T, Yue Z, Smith CJ, Chen D, et al. SLEEPLESS, a  
596 Ly-6/neurotoxin family member, regulates the levels, localization and activity of  
597 Shaker. Nat Neurosci. 2010;13(1):69-75. doi: 10.1038/nn.2454.
- 598 24. Mencacci NE, Rubio-Agusti I, Zdebik A, Asmus F, Ludtmann MH, Ryten M,  
599 et al. A missense mutation in KCTD17 causes autosomal dominant myoclonus-  
600 dystonia. Am J Hum Genet. 2015;96(6):938-47. doi: 10.1016/j.ajhg.2015.04.008.
- 601 25. Peterson DA, Sejnowski TJ, Poizner H. Convergent evidence for abnormal  
602 striatal synaptic plasticity in dystonia. Neurobiol Dis. 2010;37(3):558-73. doi:  
603 10.1016/j.nbd.2009.12.003.

- 604 26. Kume K, Kume S, Park SK, Hirsh J, Jackson FR. Dopamine is a regulator of  
605 arousal in the fruit fly. *J Neurosci*. 2005;25(32):7377-84. doi:  
606 10.1523/JNEUROSCI.2048-05.2005.
- 607 27. Ueno T, Tomita J, Tanimoto H, Endo K, Ito K, Kume S, et al. Identification of  
608 a dopamine pathway that regulates sleep and arousal in *Drosophila*. *Nat Neurosci*.  
609 2012;15(11):1516-23. doi: 10.1038/nn.3238.
- 610 28. Liu Q, Liu S, Kodama L, Driscoll MR, Wu MN. Two dopaminergic neurons  
611 signal to the dorsal fan-shaped body to promote wakefulness in *Drosophila*. *Curr*  
612 *Biol*. 2012;22(22):2114-23. doi: 10.1016/j.cub.2012.09.008.
- 613 29. Lehner B. Genotype to phenotype: lessons from model organisms for human  
614 genetics. *Nat Rev Genet*. 2013;14(3):168-78. doi: 10.1038/nrg3404.
- 615 30. Ozelius LJ, Hewett JW, Page CE, Bressman SB, Kramer PL, Shalish C, et al.  
616 The early-onset torsion dystonia gene (DYT1) encodes an ATP-binding protein. *Nat*  
617 *Genet*. 1997;17(1):40-8. doi: 10.1038/ng0997-40.
- 618 31. Fuchs T, Saunders-Pullman R, Masuho I, Luciano MS, Raymond D, Factor S,  
619 et al. Mutations in GNAL cause primary torsion dystonia. *Nat Genet*. 2013;45(1):88-  
620 92. doi: 10.1038/ng.2496.
- 621 32. Charlesworth G, Plagnol V, Holmstrom KM, Bras J, Sheerin UM, Preza E, et  
622 al. Mutations in ANO3 cause dominant craniocervical dystonia: ion channel  
623 implicated in pathogenesis. *Am J Hum Genet*. 2012;91(6):1041-50. doi:  
624 10.1016/j.ajhg.2012.10.024.
- 625 33. Charlesworth G, Angelova PR, Bartolome-Robledo F, Ryten M, Trabzuni D,  
626 Stamelou M, et al. Mutations in HPCA cause autosomal-recessive primary isolated  
627 dystonia. *Am J Hum Genet*. 2015;96(4):657-65. doi: 10.1016/j.ajhg.2015.02.007.

- 628 34. Fuchs T, Gavarini S, Saunders-Pullman R, Raymond D, Ehrlich ME,  
629 Bressman SB, et al. Mutations in the THAP1 gene are responsible for DYT6 primary  
630 torsion dystonia. *Nat Genet.* 2009;41(3):286-8. doi: 10.1038/ng.304.
- 631 35. Pfeiffenberger C, Lear BC, Keegan KP, Allada R. Processing sleep data  
632 created with the *Drosophila* Activity Monitoring (DAM) System. *Cold Spring Harb*  
633 *Protoc.* 2010;2010(11):pdb prot5520. doi: 10.1101/pdb.prot5520.
- 634 36. Lamaze A, Ozturk-Colak A, Fischer R, Peschel N, Koh K, Jepson JE.  
635 Regulation of sleep plasticity by a thermo-sensitive circuit in *Drosophila*. *Sci Rep.*  
636 2017;7:40304. doi: 10.1038/srep40304.
- 637 37. Koh K, Zheng X, Sehgal A. JETLAG resets the *Drosophila* circadian clock by  
638 promoting light-induced degradation of TIMELESS. *Science.* 2006;312(5781):1809-  
639 12. doi: 10.1126/science.1124951.
- 640 38. Peschel N, Veleri S, Stanewsky R. Veela defines a molecular link between  
641 Cryptochrome and Timeless in the light-input pathway to *Drosophila*'s circadian  
642 clock. *Proc Natl Acad Sci U S A.* 2006;103(46):17313-8. doi:  
643 10.1073/pnas.0606675103.
- 644 39. Stanewsky R, Kaneko M, Emery P, Beretta B, Wager-Smith K, Kay SA, et al.  
645 The *cryb* mutation identifies cryptochrome as a circadian photoreceptor in  
646 *Drosophila*. *Cell.* 1998;95(5):681-92. PubMed PMID: 9845370.
- 647 40. Fogle KJ, Parson KG, Dahm NA, Holmes TC. CRYPTOCHROME is a blue-  
648 light sensor that regulates neuronal firing rate. *Science.* 2011;331(6023):1409-13. doi:  
649 10.1126/science.1199702.
- 650 41. Breakefield XO, Blood AJ, Li Y, Hallett M, Hanson PI, Standaert DG. The  
651 pathophysiological basis of dystonias. *Nat Rev Neurosci.* 2008;9(3):222-34. doi:  
652 10.1038/nrn2337.

- 653 42. Donlea JM, Thimgan MS, Suzuki Y, Gottschalk L, Shaw PJ. Inducing sleep  
654 by remote control facilitates memory consolidation in *Drosophila*. *Science*.  
655 2011;332(6037):1571-6. doi: 10.1126/science.1202249.
- 656 43. Joiner WJ, Crocker A, White BH, Sehgal A. Sleep in *Drosophila* is regulated  
657 by adult mushroom bodies. *Nature*. 2006;441(7094):757-60. doi:  
658 10.1038/nature04811.
- 659 44. Pitman JL, McGill JJ, Keegan KP, Allada R. A dynamic role for the  
660 mushroom bodies in promoting sleep in *Drosophila*. *Nature*. 2006;441(7094):753-6.  
661 doi: 10.1038/nature04739.
- 662 45. Seidner G, Robinson JE, Wu M, Worden K, Masek P, Roberts SW, et al.  
663 Identification of Neurons with a Privileged Role in Sleep Homeostasis in *Drosophila*  
664 *melanogaster*. *Curr Biol*. 2015;25(22):2928-38. doi: 10.1016/j.cub.2015.10.006.
- 665 46. Sitaraman D, Aso Y, Jin X, Chen N, Felix M, Rubin GM, et al. Propagation of  
666 Homeostatic Sleep Signals by Segregated Synaptic Microcircuits of the *Drosophila*  
667 Mushroom Body. *Curr Biol*. 2015;25(22):2915-27. doi: 10.1016/j.cub.2015.09.017.
- 668 47. Jenett A, Rubin GM, Ngo TT, Shepherd D, Murphy C, Dionne H, et al. A  
669 GAL4-driver line resource for *Drosophila* neurobiology. *Cell Rep*. 2012;2(4):991-  
670 1001. doi: 10.1016/j.celrep.2012.09.011.
- 671 48. Jiang Y, Pitmon E, Berry J, Wolf FW, McKenzie Z, Lebestky TJ. A Genetic  
672 Screen To Assess Dopamine Receptor (DopR1) Dependent Sleep Regulation in  
673 *Drosophila*. *G3 (Bethesda)*. 2016;6(12):4217-26. doi: 10.1534/g3.116.032136.
- 674 49. Lebestky T, Chang JS, Dankert H, Zelnik L, Kim YC, Han KA, et al. Two  
675 different forms of arousal in *Drosophila* are oppositely regulated by the dopamine D1  
676 receptor ortholog DopR via distinct neural circuits. *Neuron*. 2009;64(4):522-36. doi:  
677 10.1016/j.neuron.2009.09.031.

- 678 50. Hamada FN, Rosenzweig M, Kang K, Pulver SR, Ghezzi A, Jegla TJ, et al.  
679 An internal thermal sensor controlling temperature preference in *Drosophila*. *Nature*.  
680 2008;454(7201):217-20. doi: 10.1038/nature07001.
- 681 51. Burgoyne RD, Haynes LP. Understanding the physiological roles of the  
682 neuronal calcium sensor proteins. *Mol Brain*. 2012;5(1):2. doi: 10.1186/1756-6606-5-  
683 2.
- 684 52. Teng DH, Chen CK, Hurley JB. A highly conserved homologue of bovine  
685 neurocalcin in *Drosophila melanogaster* is a Ca(2+)-binding protein expressed in  
686 neuronal tissues. *J Biol Chem*. 1994;269(50):31900-7.
- 687 53. Wu M, Robinson JE, Joiner WJ. SLEEPLESS is a bifunctional regulator of  
688 excitability and cholinergic synaptic transmission. *Curr Biol*. 2014;24(6):621-9. doi:  
689 10.1016/j.cub.2014.02.026.
- 690 54. Shi M, Yue Z, Kuryatov A, Lindstrom JM, Sehgal A. Identification of Redeye,  
691 a new sleep-regulating protein whose expression is modulated by sleep amount. *Elife*.  
692 2014;3:e01473. doi: 10.7554/eLife.01473.
- 693 55. Guven-Ozkan T, Davis RL. Functional neuroanatomy of *Drosophila* olfactory  
694 memory formation. *Learn Mem*. 2014;21(10):519-26. doi: 10.1101/lm.034363.114.
- 695 56. Jo J, Son GH, Winters BL, Kim MJ, Whitcomb DJ, Dickinson BA, et al.  
696 Muscarinic receptors induce LTD of NMDAR EPSCs via a mechanism involving  
697 hippocalcin, AP2 and PSD-95. *Nat Neurosci*. 2010;13(10):1216-24. doi:  
698 10.1038/nn.2636.
- 699 57. Kim KS, Kobayashi M, Takamatsu K, Tzingounis AV. Hippocalcin and  
700 KCNQ channels contribute to the kinetics of the slow afterhyperpolarization. *Biophys*  
701 *J*. 2012;103(12):2446-54. doi: 10.1016/j.bpj.2012.11.002.

- 702 58. Tzingounis AV, Kobayashi M, Takamatsu K, Nicoll RA. Hippocalcin gates  
703 the calcium activation of the slow afterhyperpolarization in hippocampal pyramidal  
704 cells. *Neuron*. 2007;53(4):487-93. doi: 10.1016/j.neuron.2007.01.011.
- 705 59. Tzingounis AV, Nicoll RA. Contribution of KCNQ2 and KCNQ3 to the  
706 medium and slow afterhyperpolarization currents. *Proc Natl Acad Sci U S A*.  
707 2008;105(50):19974-9. doi: 10.1073/pnas.0810535105.
- 708 60. Helassa N, Antonyuk SV, Lian LY, Haynes LP, Burgoyne RD. Biophysical  
709 and functional characterization of hippocalcin mutants responsible for human  
710 dystonia. *Hum Mol Genet*. 2017. doi: 10.1093/hmg/ddx133.
- 711 61. Wakabayashi-Ito N, Ajjuri RR, Henderson BW, Doherty OM, Breakefield  
712 XO, O'Donnell JM, et al. Mutant human torsinA, responsible for early-onset dystonia,  
713 dominantly suppresses GTPCH expression, dopamine levels and locomotion in  
714 *Drosophila melanogaster*. *Biol Open*. 2015;4(5):585-95. doi: 10.1242/bio.201411080.
- 715 62. Wakabayashi-Ito N, Doherty OM, Moriyama H, Breakefield XO, Gusella JF,  
716 O'Donnell JM, et al. Dtorsin, the *Drosophila* ortholog of the early-onset dystonia  
717 TOR1A (DYT1), plays a novel role in dopamine metabolism. *PLoS One*.  
718 2011;6(10):e26183. doi: 10.1371/journal.pone.0026183.
- 719 63. Ichinose H, Ohye T, Takahashi E, Seki N, Hori T, Segawa M, et al. Hereditary  
720 progressive dystonia with marked diurnal fluctuation caused by mutations in the GTP  
721 cyclohydrolase I gene. *Nat Genet*. 1994;8(3):236-42. doi: 10.1038/ng1194-236..
- 722 64. Li Q, Kellner DA, Hatch HAM, Yumita T, Sanchez S, Machold RP, et al.  
723 Conserved properties of *Drosophila insomniac* link sleep regulation and synaptic  
724 function. *PLoS Genet*. 2017;13(5):e1006815. doi: 10.1371/journal.pgen.1006815.



- 725 65. Kuo SY, Wu CL, Hsieh MY, Lin CT, Wen RK, Chen LC, et al. PPL2ab  
726 neurons restore sexual responses in aged *Drosophila* males through dopamine. Nat  
727 Commun. 2015;6:7490. doi: 10.1038/ncomms8490.
- 728 66. Zhang SX, Rogulja D, Crickmore MA. Dopaminergic Circuitry Underlying  
729 Mating Drive. Neuron. 2016;91(1):168-81. doi: 10.1016/j.neuron.2016.05.020.
- 730 67. Berry JA, Cervantes-Sandoval I, Chakraborty M, Davis RL. Sleep Facilitates  
731 Memory by Blocking Dopamine Neuron-Mediated Forgetting. Cell.  
732 2015;161(7):1656-67. doi: 10.1016/j.cell.2015.05.027.
- 733 68. Berry JA, Cervantes-Sandoval I, Nicholas EP, Davis RL. Dopamine is  
734 required for learning and forgetting in *Drosophila*. Neuron. 2012;74(3):530-42. doi:  
735 10.1016/j.neuron.2012.04.007.
- 736 69. Kaun KR, Rothenfluh A. Dopaminergic rules of engagement for memory in  
737 *Drosophila*. Curr Opin Neurobiol. 2017;43:56-62. doi: 10.1016/j.conb.2016.12.011.
- 738 70. Kamikouchi A, Inagaki HK, Effertz T, Hendrich O, Fiala A, Göpfert MC, et  
739 al. The neural basis of *Drosophila* gravity-sensing and hearing. Nature.  
740 2009;458(7235):165-71.
- 741 71. Zhong L, Bellemer A, Yan H, Ken H, Jessica R, Hwang RY, et al.  
742 Thermosensory and nonthermosensory isoforms of *Drosophila melanogaster* TRPA1  
743 reveal heat-sensor domains of a thermoTRP Channel. Cell Rep. 2012;1(1):43-55. doi:  
744 10.1016/j.celrep.2011.11.002.
- 745 72. Levine JD, Funes P, Dowse HB, Hall JC. Signal analysis of behavioral and  
746 molecular cycles. BMC Neuroscience. 2002;3(1):1.
- 747 73. Levine JD, Funes P, Dowse HB, Hall JC. Advanced analysis of a  
748 cryptochrome mutation's effects on the robustness and phase of molecular cycles in  
749 isolated peripheral tissues of *Drosophila*. BMC Neuroscience. 2002;3(1):5.

Figure 1

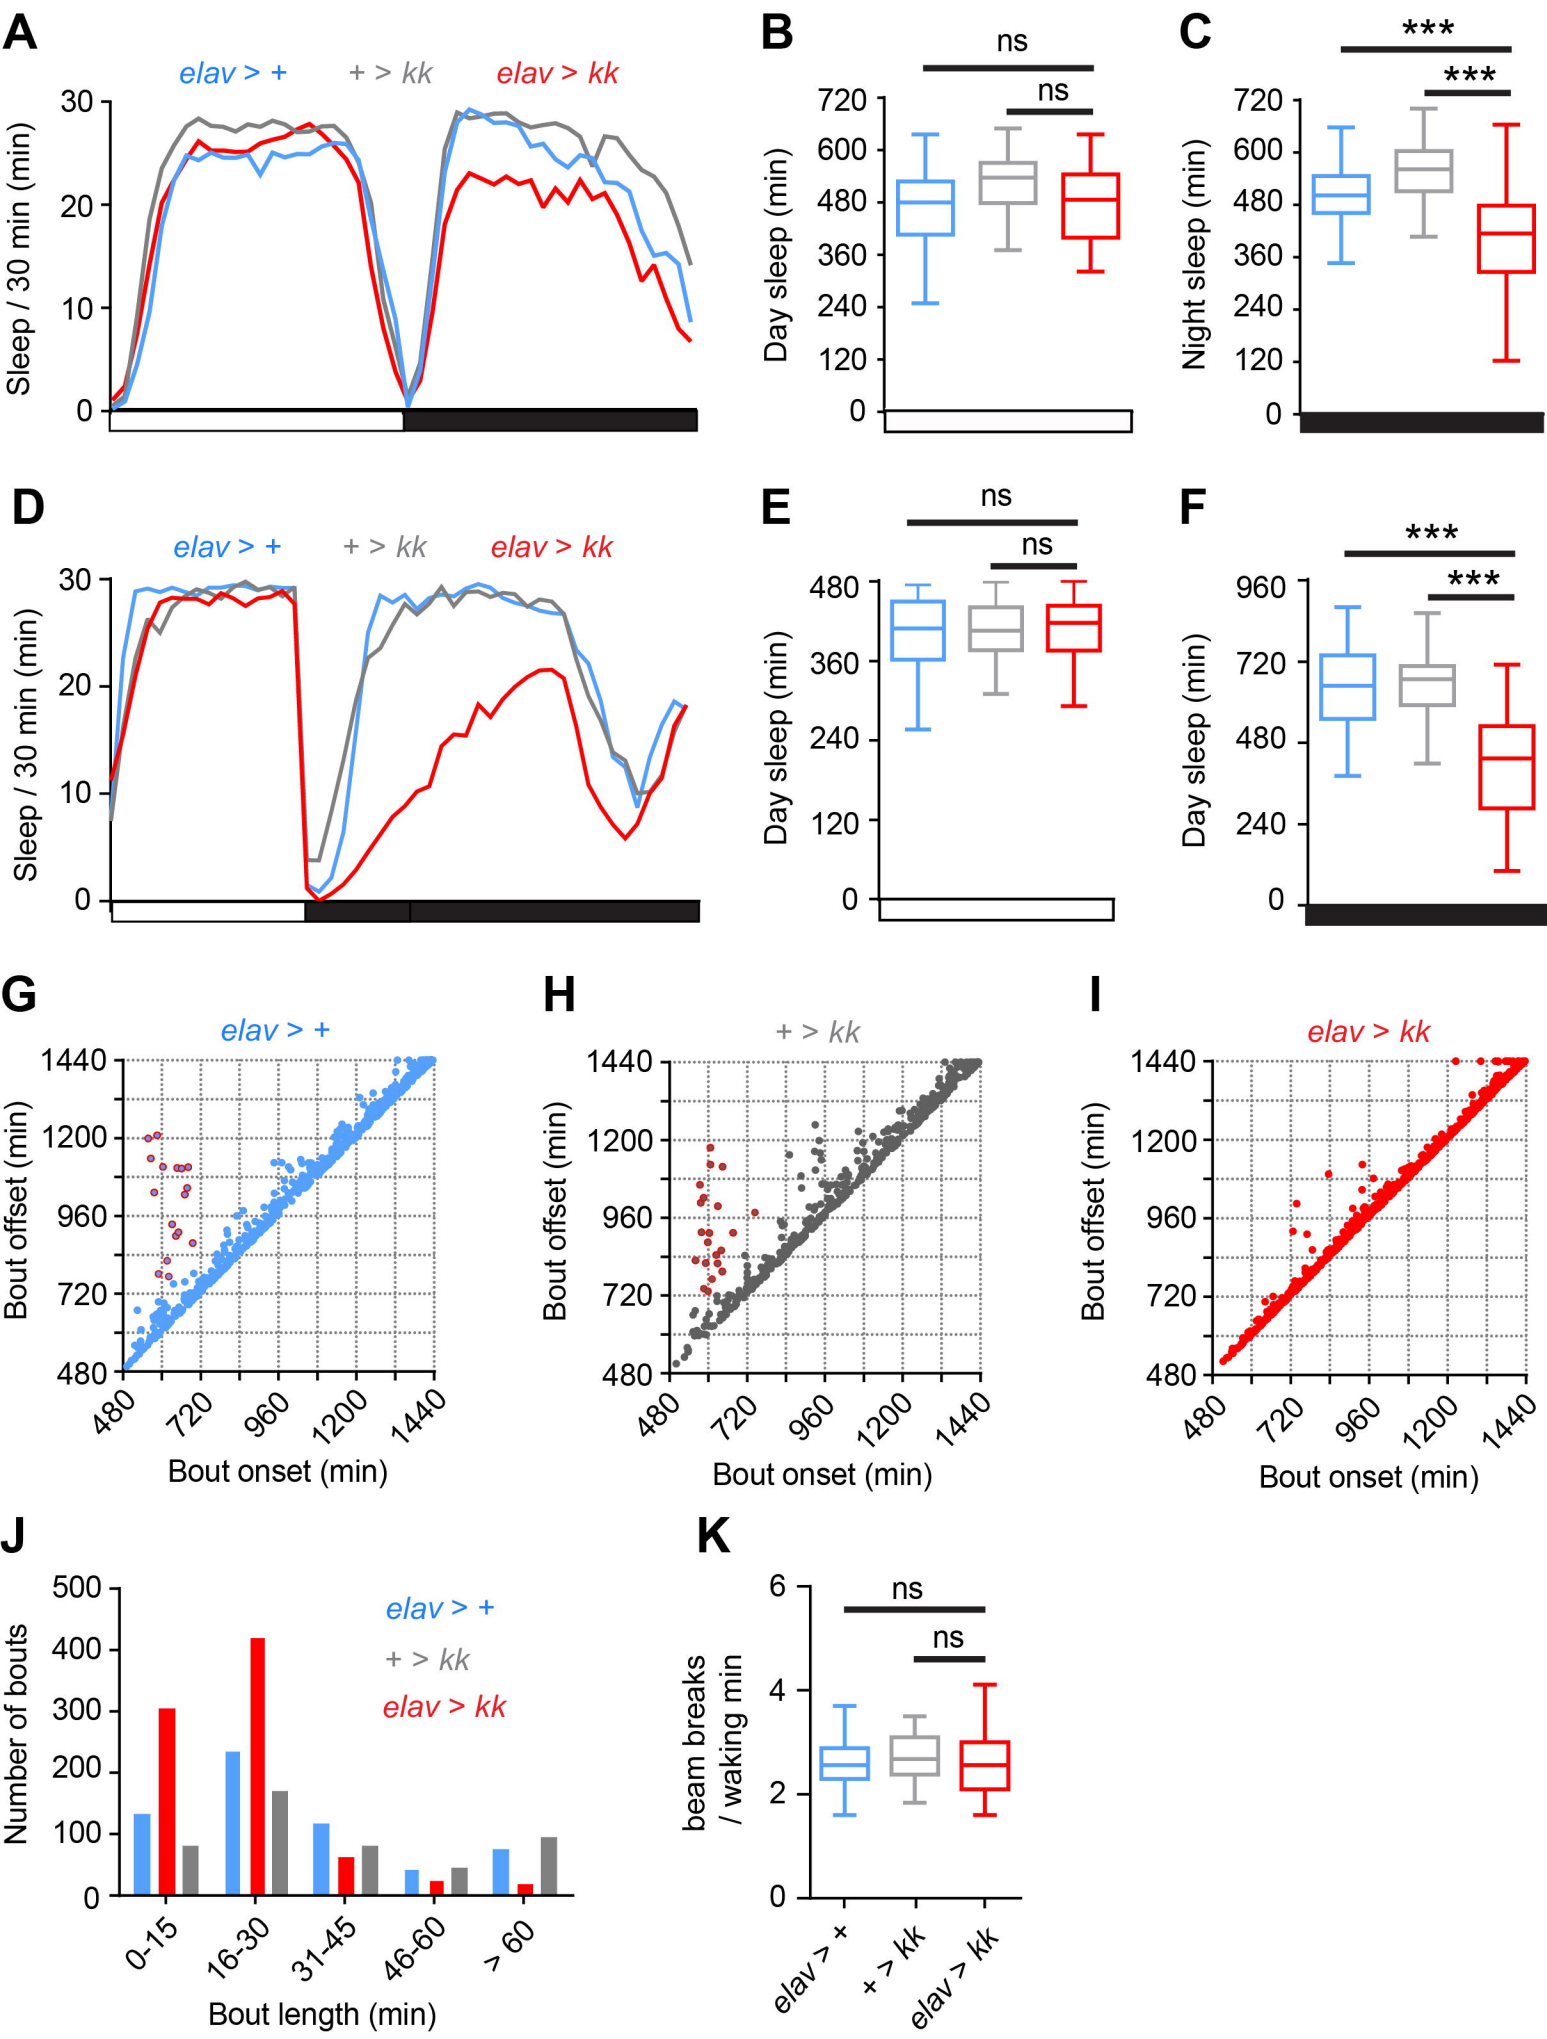

Figure 2

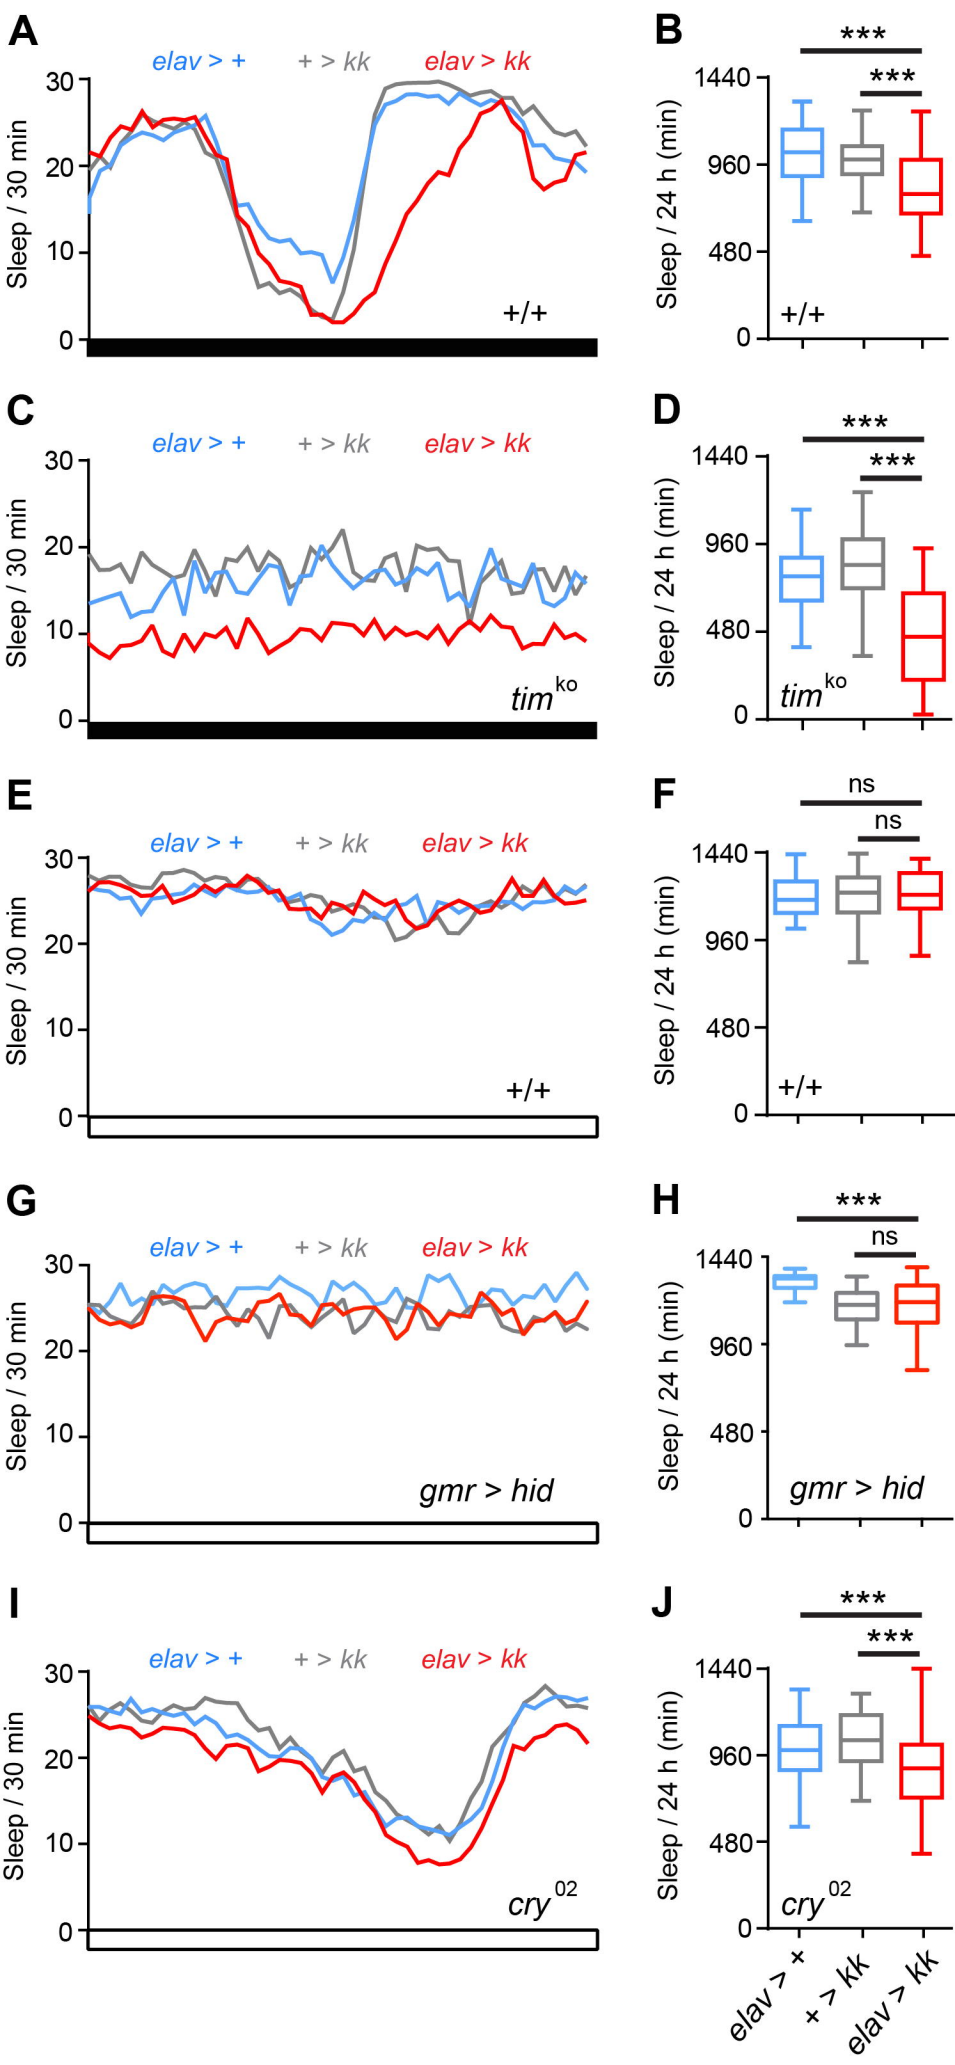

Figure 3

**A**

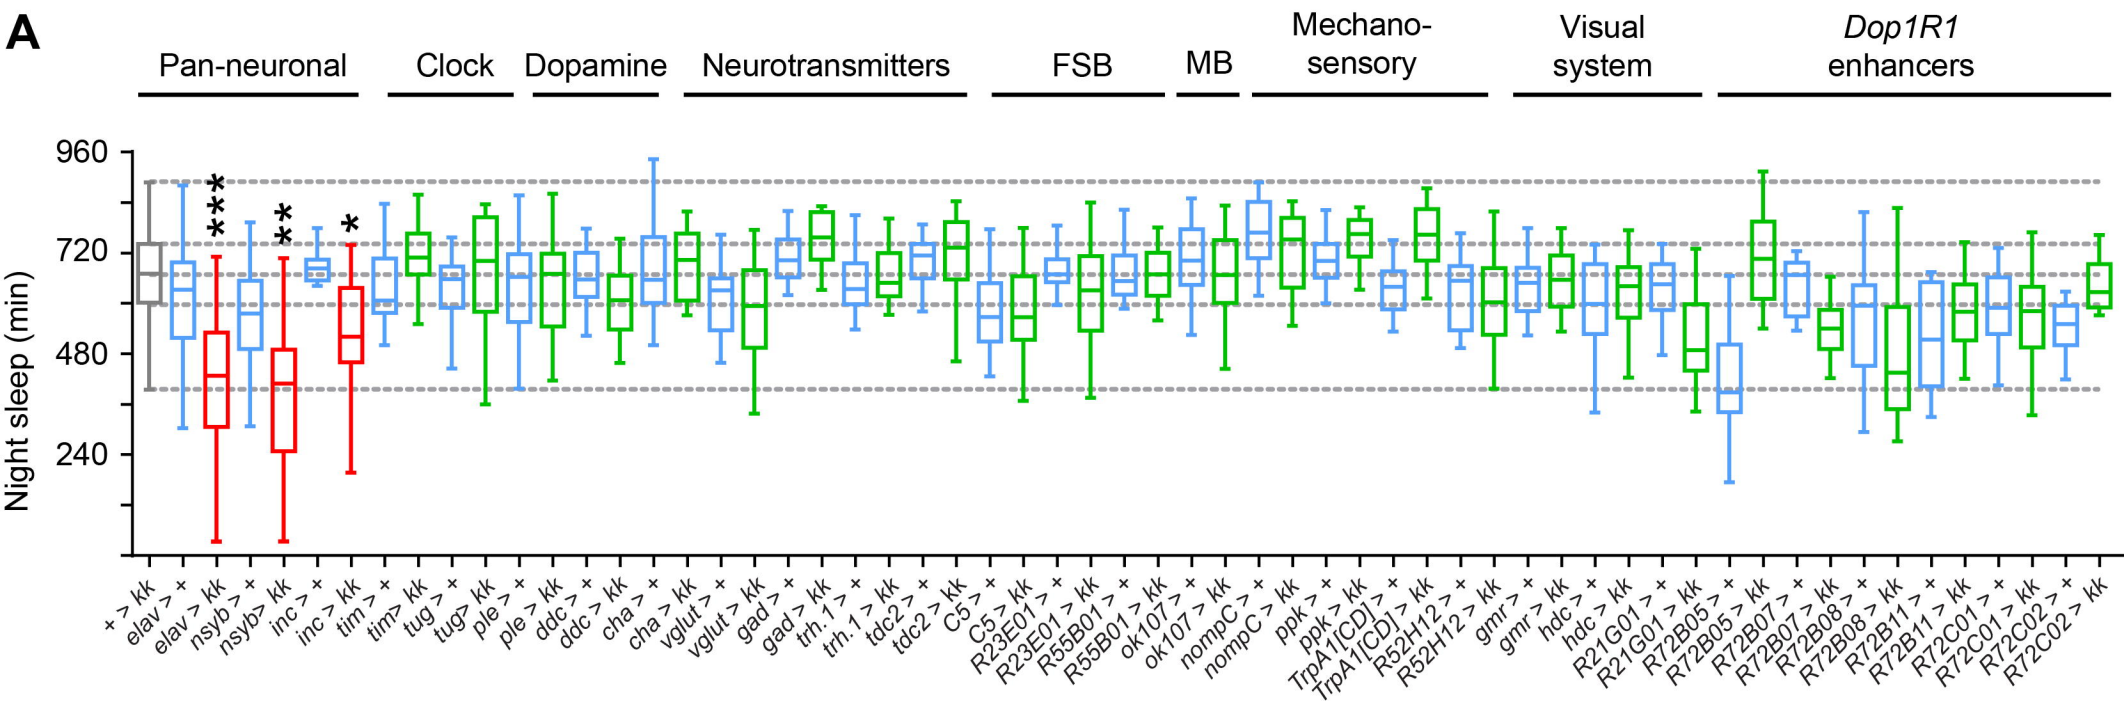

**B**

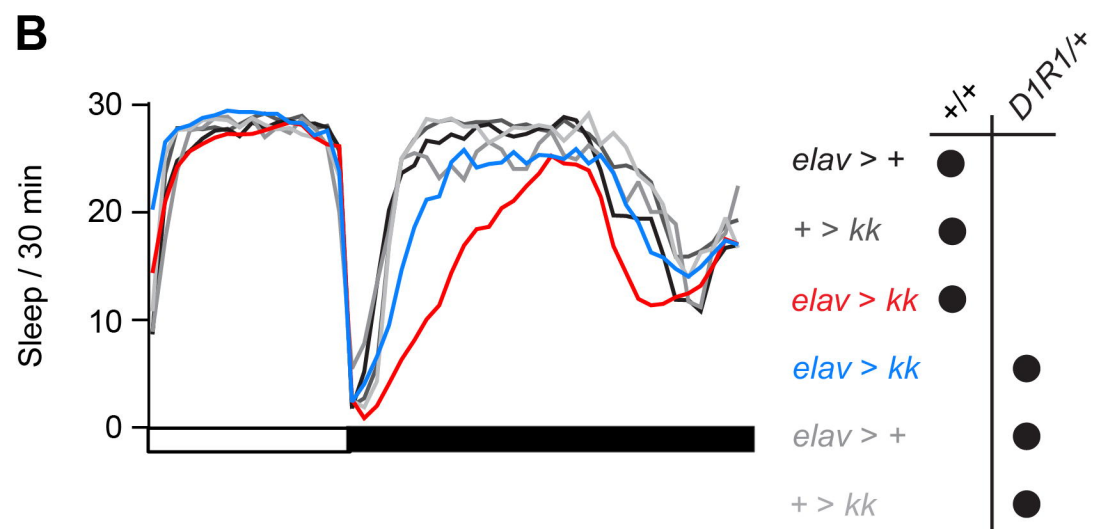

**C**

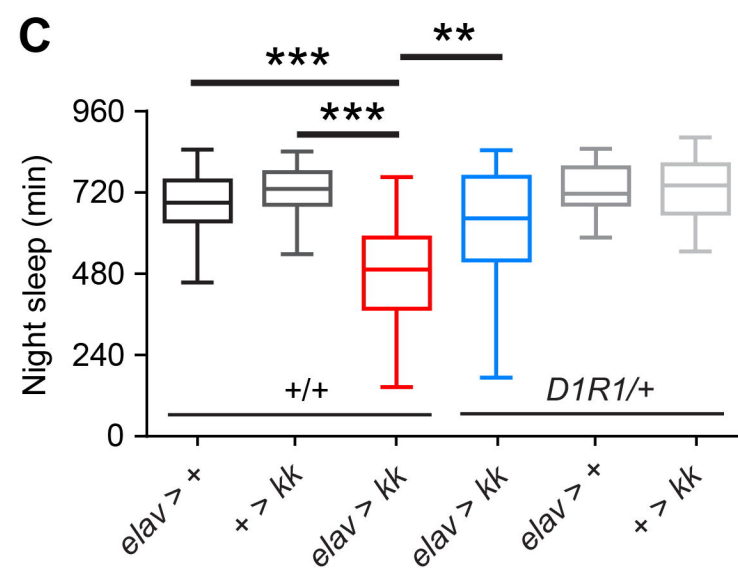



Figure 4

A

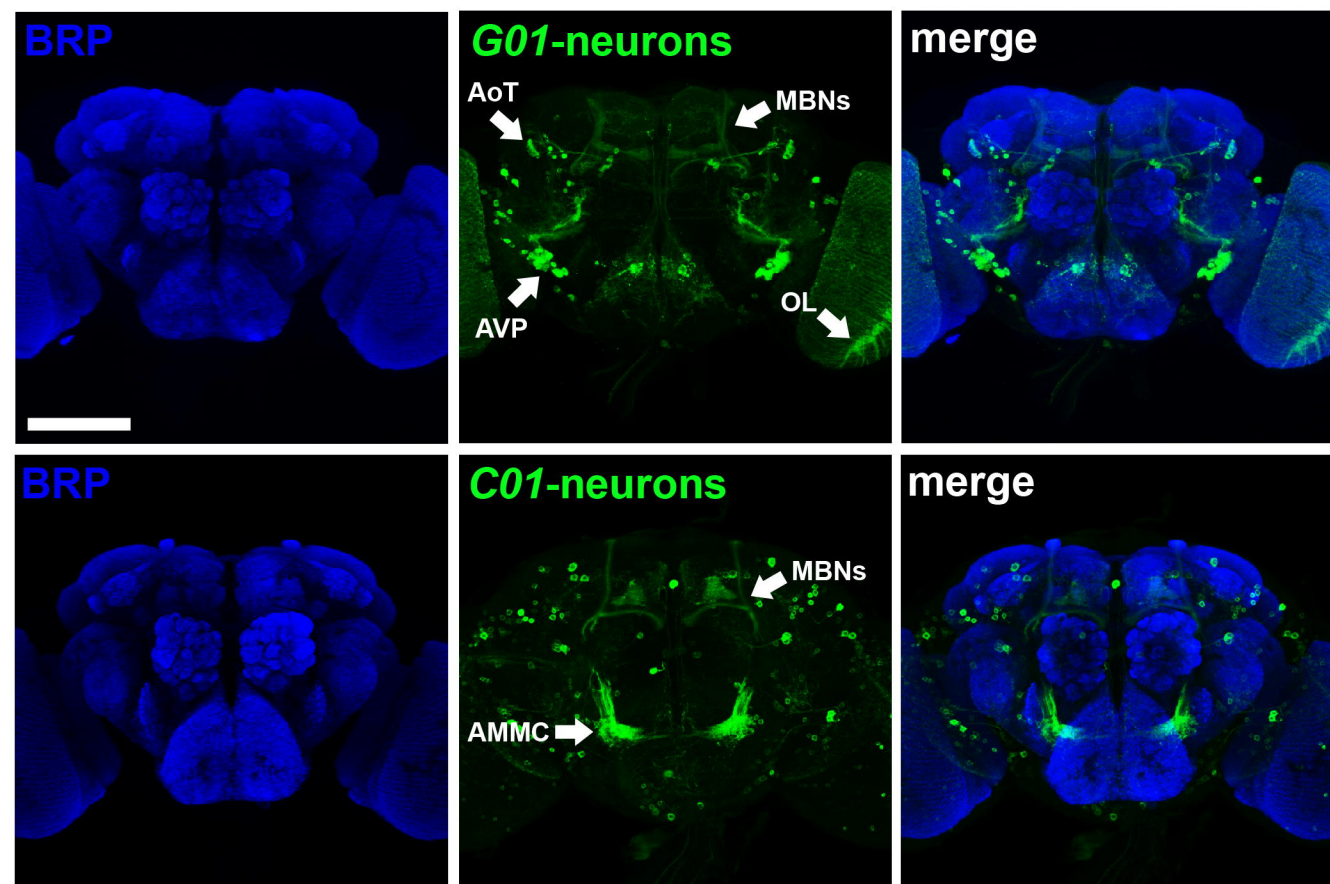

B

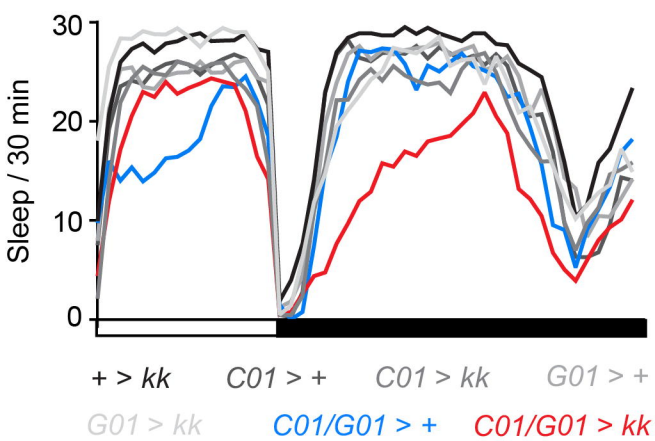

C

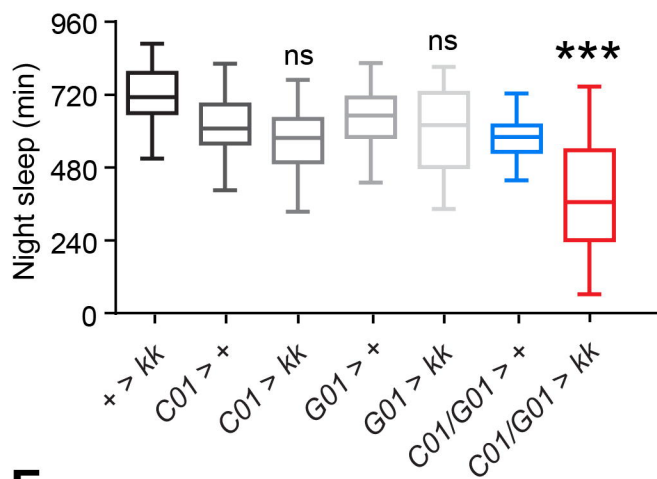

D

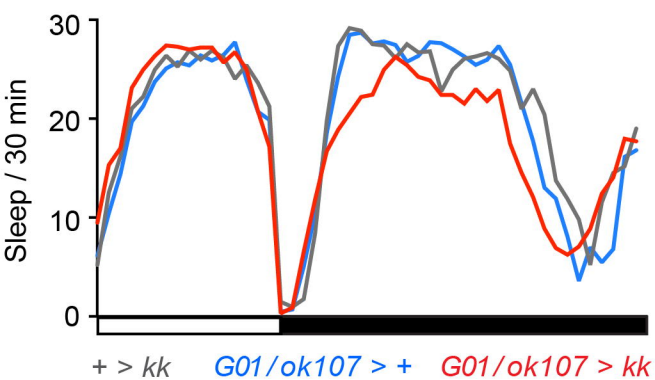

E

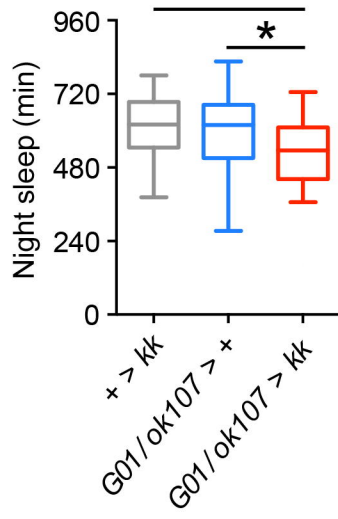

**Figure 5**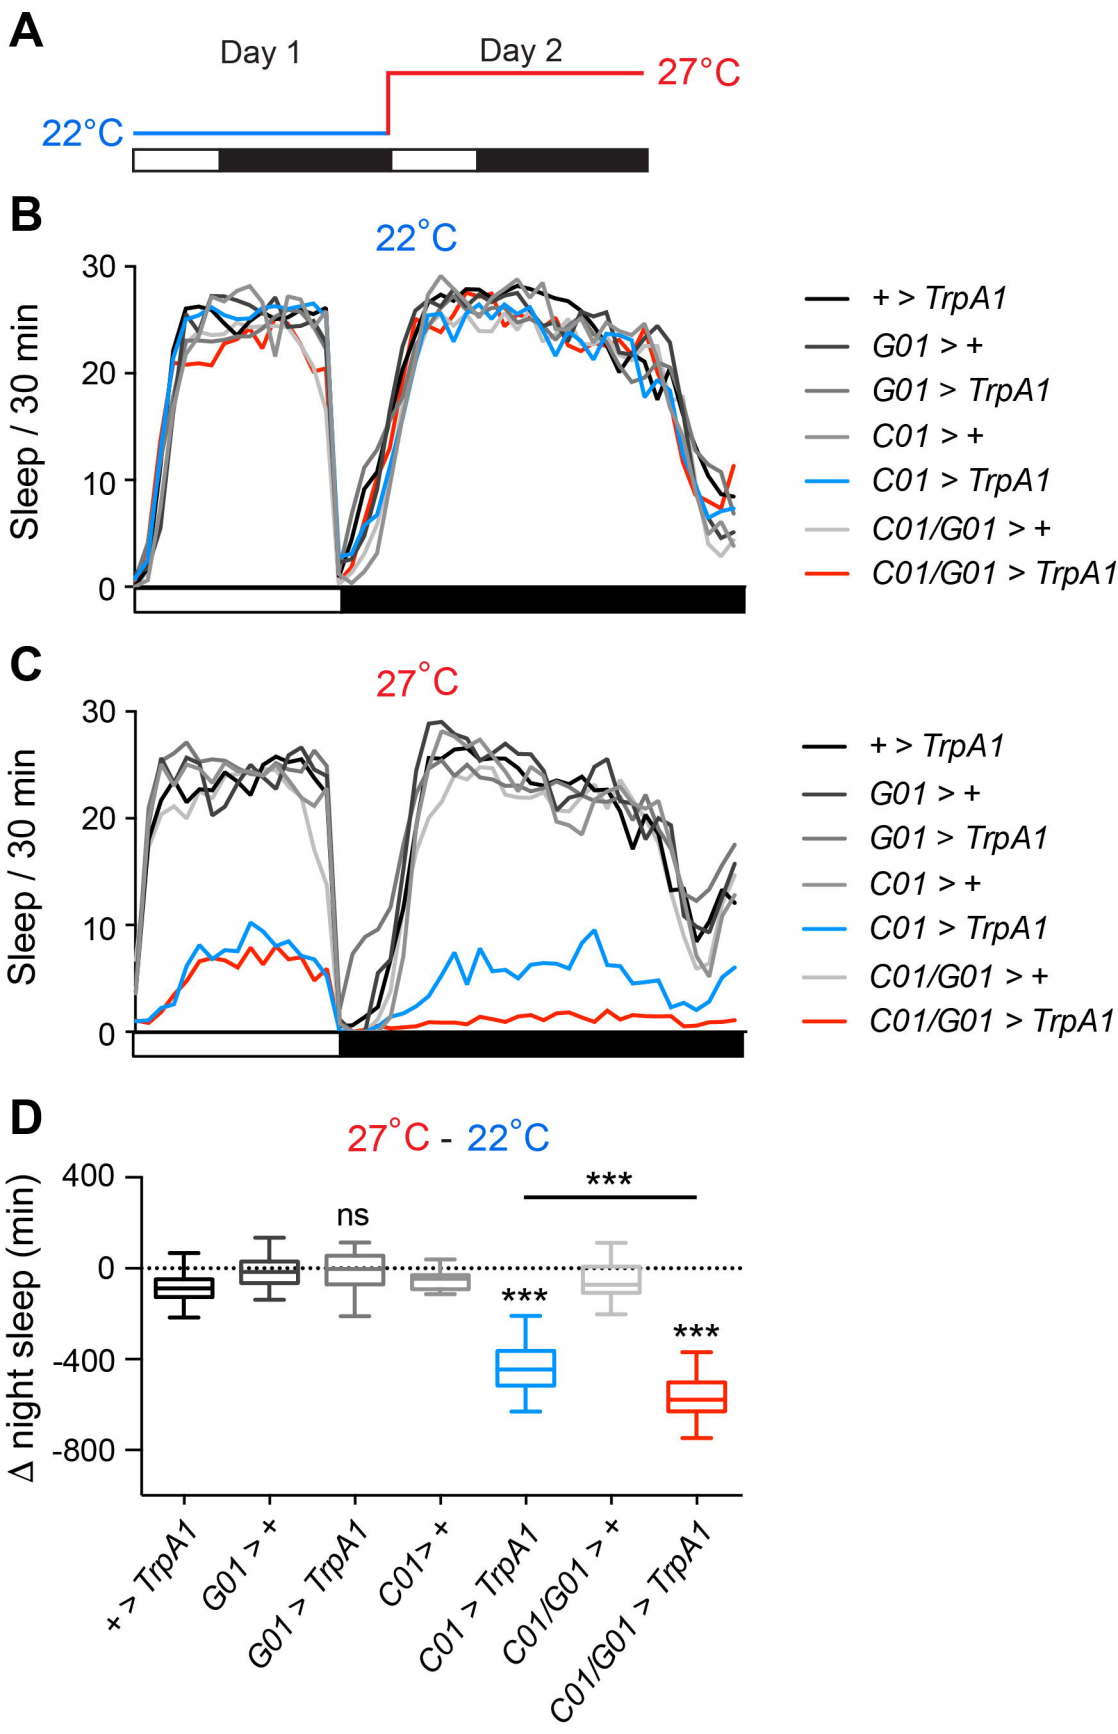

Source: http://www.biorxiv.org/content/10.1101/159772v1.full.pdf
